# Supplementary material for: Candidate Gene Analysis of Tooth Agenesis Identifies Novel Mutations in Six Genes and Suggests Significant Role for WNT and EDA Signaling and Allele Combinations
Source: PLoS One. 2013 Aug 22;8(8):e73705. doi: 10.1371/journal.pone.0073705 (PMC3750013; doi:10.1371/journal.pone.0073705)
Supplement: Table S2 — (XLSX) [file pone.0073705.s002.xlsx]

## Sheet: suppla Table 2
Table S2. Candidate gene genotypes and tooth agenesis phenotypes of relatives
Fam	Sex	age	family relationship		genotype (protein)	inherit-ance	n ta all	n ta perm	jaw	right																left
										8	7	6	5	4	3	2	1		1	2	3	4	5	6	7	8				LENSAMPLE	ROW	D48	D47	D46	D45	D44	D43	D42	D41	D31	D32	D33	D34	D35	D36	D37	D38	D55	D54
																														5
219	f	15	II:2	proband	MSX1:K237SfsX2/-	ad	12	8	U	*			*	*		p				p		*	*			*				3	18,15,14,24,25,28,38,35,31,41,45,48,p12,p22,dt7172,dt8182
									L	*			*				*		*				*			*				3	18,15,14,24,25,28,38,35,31,41,45,48,p12,p22,dt7172,dt8182
	f	45	I:2	mother	MSX1:K237SfsX2/-		12	10	U				*	*		*				*		*	*							3	15,14,12,22,24,25,38,35,31,41,45,48
									L	*			*				*		*				*			*				3	15,14,12,22,24,25,38,35,31,41,45,48
46	m	13	II:1	proband	EDA:R357W	Xl	18	8	U	*				*		*			c	*		*				*	soft nails, atopic skin			3	18,14,12,22,24,28,32,31,41,42,71,72,81,82,54,64,52,62,pal13,i21,k11,k21
									u					*		*				*		*								3	18,14,12,22,24,28,32,31,41,42,71,72,81,82,54,64,52,62,pal13,i21,k11,k21
									l							*	*		*	*										3	18,14,12,22,24,28,32,31,41,42,71,72,81,82,54,64,52,62,pal13,i21,k11,k21
									L							*	*		*	*										3	18,14,12,22,24,28,32,31,41,42,71,72,81,82,54,64,52,62,pal13,i21,k11,k21
	f	35	I:2	mother	EDA:R357W/-		unaffected
47	f	6	II:1	proband	EDAR:R325W/-	ad?	4	2	U	?						*				*						?	soft nails, atopic skin			3	12,22,52,62,k71,k81,k72,k82
									u							*				*										3	12,22,52,62,k71,k81,k72,k82
									l																					3	12,22,52,62,k71,k81,k72,k82
									L	?																?				3	12,22,52,62,k71,k81,k72,k82
	f	38	I:2	mother	EDAR:R325W/-		unaffected
	m	4	II:2	brother	EDAR:R325W/-		4	2	U	?						*				*						?	soft nails, atopic skin			3	52,62,12,22,s71,s81,s72,s82
									u							*				*										3	52,62,12,22,s71,s81,s72,s82	s	s	s	s
									l																					3	52,62,12,22,s71,s81,s72,s82
									L	?																?				3	52,62,12,22,s71,s81,s72,s82
52	m	13	III:1	proband	EDAR:R325W/	ac	5	4	U											*										3	82,22,31,41,42,m32										m
					;EDARADD:S103F				u																					3	82,22,31,41,42,m32
									l							*														3	82,22,31,41,42,m32
									L							*	*		*											3	82,22,31,41,42,m32
	f	67	I:2	grand-	EDAR:R325W/-		3		U							*
				mother					L								*		*
	f	50	II:2	mother	EDAR:R325W/-		unaffected
67	m	5	III:2	proband	EDAR:R358Q/-	ad?	10	5	U	?						*				*						?				3	12,22,41,31,32,52,62,72,82,71
									u							*				*										3	12,22,41,31,32,52,62,72,82,71
									l							*			*	*										3	12,22,41,31,32,52,62,72,82,71
									L	?							*		*	*						?				3	12,22,41,31,32,52,62,72,82,71
	f	63	I:2	grand-	EDAR:R358Q/-		2	2	U							*				*
				mother					L
	m	38	II:1	father	EDAR:R358Q/-		2	1	U
									u
									l							*
									L							*
49	f	17	II:1	proband	EDAR:E379K/-	ad?	8	4	U							*				*										3	52,62,72,82,12,22,32,42,k31,k41
									u							*				*										3	52,62,72,82,12,22,32,42,k31,k41
									l							*				*										3	52,62,72,82,12,22,32,42,k31,k41
									L							*				*										3	52,62,72,82,12,22,32,42,k31,k41
	m	41	I:1	father	EDAR:E379K/-		1	1	U							p				*										3	52,62,72,82,12,22,32,42,k31,k41
									L																					3	52,62,72,82,12,22,32,42,k31,k41
	f	40	I:2	mother	no mutation		hp		U							p				s										3	52,62,72,82,12,22,32,42,k31,k41
									L																					3	52,62,72,82,12,22,32,42,k31,k41
	m	9	II:3	brother	EDAR:E379K/-		hp		U							p				s										3	52,62,72,82,12,22,32,42,k31,k41
									L																					3	52,62,72,82,12,22,32,42,k31,k41
402	f	18	II:1	proband	EDAR:M391K/-	ad	13	6	U							*				*
									u							*				*
									l								*		*	*
									L	*			*			*				*			*			*
	m	37	I:1	father	EDAR:M391K/-		8	6	U							*	s		s	*
									L	*			*			*				*			*			*
276	m	43	II:3	proband	WNT10A:R70W/-	ac	10	6	U	*			*			*							*			*				4	15,25,35,45,$12,$37,18,28,38,48															$
					;EDARADD:S103F/-				L	*			*										*		*	*				4	15,25,35,45,$12,$37,18,28,38,48
	m	51	II:1	brother	WNT10A:R70W/-		5	5	U													*								4	31,41,#34#,#44,?38,?48,#24	?				#											?
									L					*			*		*			*								4	31,41,#34#,#44,?38,?48,#24
68	m	22	II:2	proband	WNT10A:R113C	ar	14	12	U				*		*	*				*	*		*				dry skin			3	15,13,12,22,23,25,33,43,38,48,31,41,32,42
					/F228I				L	*					*	*	*		*	*	*					*				3	15,13,12,22,23,25,33,43,38,48,31,41,32,42
	f	51	I:2	mother	WNT10A:R113C/-		hp		U											p										3	15,13,12,22,23,25,33,43,38,48,31,41,32,42
									L																					3	15,13,12,22,23,25,33,43,38,48,31,41,32,42
265	f	10	II:1	proband	WNT10A:R113C	ar	9	5	U	*							s		s	*						*				4	?12,22,37,31,41,47,18,28,38,48,s16,s26,sh11,sh21
					/F228I				L	*	*						*		*						*	*				4	?12,22,37,31,41,47,18,28,38,48,s16,s26,sh11,sh21
	f	38	I:2	mother	WNT10A:F228I/-		1	1	U							*	s		s	s										4	?12,22,37,31,41,47,18,28,38,48,s16,s26,sh11,sh21
									L																					4	?12,22,37,31,41,47,18,28,38,48,s16,s26,sh11,sh21
	f	7	II:2	sister	WNT10A:F228I/-		2	2	U	?																?				4	?12,22,37,31,41,47,18,28,38,48,s16,s26,sh11,sh21
									L	?	*														*	?				4	?12,22,37,31,41,47,18,28,38,48,s16,s26,sh11,sh21
208	f	27	II:2	proband	WNT10A:R113C	ar	22	16	U	*	*		*	*	*	*				*	*	*	*		*	*				4	18,17,15,14,13,12,22,23,4,25,27,28,38,37,35,32,44,45,47,48,s16,s26,s33,s43,inf55,inf65,inf75,inf74,inf84,inf85						s					s
					/E194AfsX28				u							*				*
									l
									L	*	*		*	*						*			*		*	*				4	18,17,15,14,13,12,22,23,4,25,27,28,38,37,35,32,44,45,47,48,s16,s26,s33,s43,inf55,inf65,inf75,inf74,inf84,inf85
	m	60	I:1	father	WNT10A:R113C/-		unaffected																							4	18,17,15,14,13,12,22,23,4,25,27,28,38,37,35,32,44,45,47,48,s16,s26,s33,s43,inf55,inf65,inf75,inf74,inf84,inf85						s					s
	f	55	I:2	mother	WNT10A:		unaffected
					E194AfsX28/-		unaffected																							4	18,17,15,14,13,12,22,23,4,25,27,28,38,37,35,32,44,45,47,48,s16,s26,s33,s43,inf55,inf65,inf75,inf74,inf84,inf85						s					s
45	f	15	III:2	proband	WNT10A:V145M/-	ar?	12	10	U				*			*				*			*				soft, thin nails			3	12,22,15,25,35,34,32,31,41,45,52,62,s71,s81,s72,s82,t17,t27,t37,t47
									u							*				*										3	12,22,15,25,35,34,32,31,41,45,52,62,s71,s81,s72,s82,t17,t27,t37,t47	s	s	s	s
									l																					3	12,22,15,25,35,34,32,31,41,45,52,62,s71,s81,s72,s82,t17,t27,t37,t47
									L				*			c	*		*	*		*	*							3	12,22,15,25,35,34,32,31,41,45,52,62,s71,s81,s72,s82,t17,t27,t37,t47
	m	40	III:4	cousin A	WNT10A:V145M/-		4	4	U							*														3	15,14,12,22,24,25,35,34,32,42,45
									L				*			*							*							3	15,14,12,22,24,25,35,34,32,42,45
	f	9	IV:1	cousin B's	WNT10A:V145M/-		11	11	U				*	*		*				*		*	*							3	15,14,12,22,24,25,35,34,32,42,45
				daughter					L				*			*				*		*	*							3	15,14,12,22,24,25,35,34,32,42,45
In this family, four unaffected family members carried p.V145M																														3	15,14,12,22,24,25,35,34,32,42,45
48	m	18	II:1	proband	WNT10A:L154M/-	ad?	4	4	U														*				atopia
									L							*	*			*
	m	41	I:1	father	WNT10A:L154M/-		unaffected
	m	13	II:2	brother	WNT10A:L154M/-		unaffected
	f	10	II:3	sister	WNT10A:L154M/-		2	2	U
									L				*										*
42	m	11	II:2	proband	WNT10A:G165R/-	?	34	18	U	*			*	*		*				*	*	*	*			*	fragile nails, thin hair, dry skin			3	15,14,12,22,23,24,25,35,34,33,32,31,41,42,43,44,45,18,28,38,37,48,54,53,52,65,63,64,74,73,71,81,83,84
									u					*	*	*					*	*	*							3	15,14,12,22,23,24,25,35,34,33,32,31,41,42,43,44,45,18,28,38,37,48,54,53,52,65,63,64,74,73,71,81,83,84
									l					*	*		*		*		*	*								3	15,14,12,22,23,24,25,35,34,33,32,31,41,42,43,44,45,18,28,38,37,48,54,53,52,65,63,64,74,73,71,81,83,84
									L	*			*	*	*	*	*		*	*	*	*	*		*	*				3	15,14,12,22,23,24,25,35,34,33,32,31,41,42,43,44,45,18,28,38,37,48,54,53,52,65,63,64,74,73,71,81,83,84
	f	51	I:2	mother	WNT10A:G165R/-		1	1	U							*											thin, fragile nails			3	15,14,12,22,23,24,25,35,34,33,32,31,41,42,43,44,45,18,28,38,37,48,54,53,52,65,63,64,74,73,71,81,83,84
									L																					3	15,14,12,22,23,24,25,35,34,33,32,31,41,42,43,44,45,18,28,38,37,48,54,53,52,65,63,64,74,73,71,81,83,84
	f	15	II:1	sister	WNT10A:G165R/-		unaffected																							3	15,14,12,22,23,24,25,35,34,33,32,31,41,42,43,44,45,18,28,38,37,48,54,53,52,65,63,64,74,73,71,81,83,84
207	m	11	II:2	proband	WNT10A:E222X	ar	15	11	U	*	*					*				p					*	*				4	18,17,12,27,28,38,37,33,32,31,41,42,43,47,48,p22
					/F228I				L	*	*				*	*	*		*	*	*				*	*				4	18,17,12,27,28,38,37,33,32,31,41,42,43,47,48,p22
	f	45	I:1	father	WNT10A:F228I/-		unaffected																							4	18,17,27,28,38,37,35,43,45,47,48,p12,p22,inf75,inf85
	m	44	I:2	mother	WNT10A:E222X/-		2	0	U							s				s										4	18,17,12,27,28,38,37,33,32,31,41,42,43,47,48,p22
									L	*																*				4	18,17,12,27,28,38,37,33,32,31,41,42,43,47,48,p22
	f	13	II:1	sister	WNT10A:E222X		11	7	U	*	*					p				p					*	*				4	18,17,27,28,38,37,35,43,45,47,48,p12,p22,inf75,inf85
					/F228I				L	*	*		*		*								*		*	*				4	18,17,27,28,38,37,35,43,45,47,48,p12,p22,inf75,inf85
106	m	7	II:2	proband	WNT10A:F228I	ar	15	15	U	?			*		*	p				p	*	*	*			?				3	p12,p22,13,23,24,15,25,35,34,33,32,31,41,4,24,3,44,45,?52
					/F228I				L	?			*	*	*	*	*		*	*	*	*	*			?				3	p12,p22,13,23,24,15,25,35,34,33,32,31,41,4,24,3,44,45,?52
	m	33	I:1	father	WNT10A:F228I/-		2	2	U				*							p			*							3	p12,p22,13,23,24,15,25,35,34,33,32,31,41,4,24,3,44,45,?52
									L																					3	p12,p22,13,23,24,15,25,35,34,33,32,31,41,4,24,3,44,45,?52
	m	10	II:1	sister	WNT10A:F228I/-		unaffected																							3	p12,p22,13,23,24,15,25,35,34,33,32,31,41,4,24,3,44,45,?52
12	f	49	II:12	proband	WNT10A:F228I/-	?	11	7	U	*			*	*									*			*				4	31,41,14,15,25,35,45,18,28,38,48
									L	*			*				*		*				*			*				4	31,41,14,15,25,35,45,18,28,38,48
	f	61	II:4	sister	WNT10A:F228I/-		2	2	U							p				p										4	31,41,14,15,25,35,45,18,28,38,48
									L				*										*							4	31,41,14,15,25,35,45,18,28,38,48
	f	41	III:3	II:4's	WNT10A:F228I/-		2	0	U																					4	31,41,14,15,25,35,45,18,28,38,48
				daughter					L	*																*				4	31,41,14,15,25,35,45,18,28,38,48
	f	46	III:4	II:4's	WNT10A:F228I/-		5	1	U	*			p													*				4	31,41,14,15,25,35,45,18,28,38,48
				daughter					L	*													*			*				4	31,41,14,15,25,35,45,18,28,38,48
	f	31	III:5	II:8's	no mutation		3	2	U	*						*				*										4	15,25,35,45,27,34,18,28,38,48
				daughter					L																					4	15,25,35,45,27,34,18,28,38,48
	m	31	III:7	II:10's son	no mutation		6	2	U	*										s						*
									L	*			*										*			*
	m	25	III:8	son	no mutation		4	3	U							*				*
									L	*							*		p
	m	22	III:9	son	no mutation		6	3	U	*																*
									L								*		*				*			*
	f	15	IV:1	III:3's	WNT10A:F228I/-		10	6	U	*			*										*		*	*				4	15,25,35,45,27,34,18,28,38,48
				daughter					L	*			*									*	*			*				4	15,25,35,45,27,34,18,28,38,48
In this family, seven other affected family members had wildtype WNT10A
51	m	9	II:2	proband	WNT10A:F228I/-	ad?	4	4	U							*				*										3	12,22,31,41
									L								*		*											3	12,22,31,41
	m	52	I:1	father	WNT10A:F228I/-		2	2	U							*				*										3	12,22,31,41
									L																					3	12,22,31,41
214	m	11	II:2	proband	WNT10A:F228I/-	?	10	6	U	*			*	*								*	*			*				4	15,14,24,25,35,45,18,28,38,48,pal13,pal23,r13,r23,inf55,inf65,inf75,inf85
									L	*			*										*			*				4	15,14,24,25,35,45,18,28,38,48,pal13,pal23,r13,r23,inf55,inf65,inf75,inf85
	m	42	I:1	father	WNT10A:F228I/-		8	5	U	*			*	*								*	*			*				4	15,14,24,25,35,45,18,28,38,48,pal13,pal23,r13,r23,inf55,inf65,inf75,inf85
									L	*				*																4	15,14,24,25,35,45,18,28,38,48,pal13,pal23,r13,r23,inf55,inf65,inf75,inf85
	m	14	II:1	brother	WNT10A:F228I/-		4	3	U	*			*										*							4	15,14,24,25,35,45,18,28,38,48,pal13,pal23,r13,r23,inf55,inf65,inf75,inf85
									L														*							4	15,14,24,25,35,45,18,28,38,48,pal13,pal23,r13,r23,inf55,inf65,inf75,inf85
229	m	12	II:1	proband	WNT10A:F228I/-	?	12	8	U	*			*	*								*	*			*				4	18,28,38,48,15,14,24,25,34,35,44,45
									L	*			*	*								*	*			*				4	18,28,38,48,15,14,24,25,34,35,44,45
	f	47	I:2	mother	WNT10A:F228I/-		2	2	U																					4	18,28,38,48,15,14,24,25,34,35,44,45
									L				*										*							4	18,28,38,48,15,14,24,25,34,35,44,45
	f	10	II:2	sister	WNT10A:F228I/-		7	3	U	*			*													*				4	18,28,38,48,15,14,24,25,34,35,44,45
									L	*			*										*			*				4	18,28,38,48,15,14,24,25,34,35,44,45
254	m	17	II:2	proband	WNT10A:F228I/-	?	8	5	U	*						*				*						*				4	12,22,31,41,43,18,28,48
									L	*					*		*		*											4	12,22,31,41,43,18,28,48
	m	44	I:1	father	WNT10A:F228I/-		unaffected																							4	12,22,31,41,43,18,28,48
261	m	16	II:2	proband	WNT10A:F228I/-	?	13	9	U	*					*	*				*	*					*				4	13,12,22,23,35,32,31,41,45,18,28,38,48
									L	*			*				*		*	*			*			*				4	13,12,22,23,35,32,31,41,45,18,28,38,48
	f	59	I:2	mother	no mutation		6	2	U	*										s						*
									L	*			*										*			*
	m	23	II:1	brother	WNT10A:F228I/-		unaffected																							4	13,12,22,23,35,32,31,41,45,18,28,38,48
The mother of this family lacks six teeth but has no alteration in WNT10A
*)fam, family; n ta all, amount of missing teeth; n ta per, amount of missing permanent teeth excluding the third molars; f, female; m, male; ad, autosomal dominant; ar, autosomal recessive; Xl, X-linked; ac, combinations of alleles of different genes; hp, hypoplasia; U, maxillary permanent teeth; L, mandibular permanent teeth; u, maxillary deciduous teeth; l, mandibular deciduous teeth; p, peg-s…
[truncated: 18 more columns]
